# Supplementary material for: Exact Permutation and Bootstrap Distribution of Generalized Pairwise Comparisons Statistics
Source: MDPI journal article supplement (doi:10.3390/math11061502), 2023-03-20
Supplement: s1 [file s1]

## Supplementary material of manuscript:

### “Exact Permutation and Bootstrap Distribution of Generalized Pairwise Comparison statistics”

#### R and SAS Code

#### R-code Permutation

```
#####
```

```
# William N Anderson
```

```
# R code for the permutation distribution, based on real skew matrices
```

```
# Compute means and variances for trial arm wins,
```

```
# based on the full permutation distribution,
```

```
# using an already computed win matrix and trial arms.
```

```
# The algorithm is  $O(N^2)$  in time and space.
```

```
#
```

```
# February 2023, based on earlier code for the 0-1 case
```

```
# This file is self contained
```

```
#####
```

```
##### utility functions. For package use would put into a separate file
```

```
checkmatrixandarms <- function(winmatrix, trialarms){
```

```
  if (length(trialarms) != nrow(winmatrix)) stop("Incompatible dimensions in win matrix and trial  
arms")
```

```

if (any(winmatrix + t(winmatrix) != 0)) stop("Win matrix not skew")
if (!all(trialarms %in% c(0, 1))) stop("Invalid trial arms")
}

# Evaluate wins for a U matrix and trial arms
wincomputations_real <- function(winmatrix, trialarms){
  # test rows is the vector of rows corresponding to the treatment arm
  testrows <- which(trialarms == 1)
  comparisonmatrix <- winmatrix[testrows, -testrows]
  # K and L correspond to the definitions in the Dong paper -- we might want those someday
  K <- pmax(comparisonmatrix, 0) # Test wins are the positive matrix entries; test losses and ties are 0
  L <- pmax(-comparisonmatrix, 0) # Control wins are the positive matrix entries; control losses and
ties are 0
  winssum <- c(sum(K), sum(L)); names(winssum) <- c("Test Win Sum", "Control Win Sum")
  # might want K and L some day, but not today
  # list(`Test win matrix` = K, `Control win matrix` = L, winssum = winssum)
  winssum
}

#####end utility functions #####

##### The practical algorithm #####

# Count Cases 1-5 at a specific vertex
onevertex_PR <- function(ins, insq, outs, outsq){
  # function to compute needed terms for a specific vertex,
  # using already computed invalues and outvalues
  # subscripts correspond to case numbering in manuscript
  # note that we do not count case 6 directly
  c(insq, ins^2 - insq, outs^2-outsq,
    ins*outs, ins*outs)
}

```

```

winsmeanandvariance_real_P <- function(winmatrix, trialarms){
  # function to compute the expected number of treatment and control wins, and their variance
  # the actual trial assignments are not relevant for this function, just the count
  #
  # winmatrix is the skew matrix of wins, perhaps from a hierarchical evaluation.
  #
  checkmatrixandarms(winmatrix, trialarms) # will stop if data are bad
  m <- sum(trialarms == 1); n <- sum(trialarms == 0); N <- m + n

  # compute various vertex values
  # computations are  $O(N^2)$ , because the matrix multiplications are by component
  # sum of values of edges pointing in to the vertex -- real analog of indegree
  invalues <- colSums(winmatrix*as.integer(winmatrix > 0))
  # sum of squares of values of edges pointing in to the vertex
  insqvalues <- colSums(winmatrix^2*as.integer(winmatrix > 0))
  # sum of values of edges pointing out of the vertex -- real analog of outdegree
  outvalues <- rowSums(winmatrix*as.integer(winmatrix > 0))
  # sum of squares of values of edges pointing out of the vertex
  outsqvalues <- rowSums(winmatrix^2*as.integer(winmatrix > 0))
  edgesum <- sum(invalues) # could also use outvalues

  # count the cases at each vertex v -- case definitions in manuscript
  # the case matrix has 5 rows (1 for each case), and N columns
  # case 6 is not represented in this matrix, because case 6 situations do not belong to a specific
  vertex
  # the matrix is perhaps useful in understanding the algorithm, but only the rowSums are actually
  used
  casematrix <- mapply(onevertex_PR, invalues, insqvalues, outvalues, outsqvalues)
  # add the cases from all the vertices
  casecounts <- rowSums(casematrix)
  casecounts[6] <- edgesum^2 - sum(casecounts) # now we have case 6

```

```

expected = rep(edgesum*m*n/(N*(N - 1)), 2)
names(expected) <- c("Test Win Sum", "Control Win Sum")
TTerms <- c(m*n/(N*(N - 1)), m*n*(m - 1)/(N*(N - 1)*(N - 2)),
            m*n*(n - 1)/(N*(N - 1)*(N - 2)), 0, 0,
            m*n*(m - 1)*(n - 1)/(N*(N - 1)*(N - 2)*(N - 3)))
CTerms <- c(m*n/(N*(N - 1)), m*n*(n - 1)/(N*(N - 1)*(N - 2)),
            m*n*(m - 1)/(N*(N - 1)*(N - 2)), 0, 0,
            m*n*(m - 1)*(n - 1)/(N*(N - 1)*(N - 2)*(N - 3)))
TCTerms <- c(0, 0, 0, m*n*(n - 1)/(N*(N - 1)*(N - 2)),
            m*n*(m - 1)/(N*(N - 1)*(N - 2)),
            m*n*(m - 1)*(n - 1)/(N*(N - 1)*(N - 2)*(N - 3)))
CTTerms <- c(0, 0, 0, m*n*(m - 1)/(N*(N - 1)*(N - 2)),
            m*n*(n - 1)/(N*(N - 1)*(N - 2)),
            m*n*(m - 1)*(n - 1)/(N*(N - 1)*(N - 2)*(N - 3)))
expectedforvariance <- c(sum(casecounts*TTerms), sum(casecounts*TCTerms),
                        sum(casecounts*CTTerms), sum(casecounts*CTerms))
expectedforvariance <- matrix(expectedforvariance, nrow = 2)
variance <- expectedforvariance - expected %*% t(expected)
rownames(variance) <- c("Test Win Sum", "Control Win Sum")
colnames(variance) <- c("Test Win Sum", "Control Win Sum")
# The observed wins are not relevant for this algorithm
# But would be nice to have in the output
Observed <- wincomputations_real(winmatrix, trialarms)
list(Observed = Observed, Expected = expected, Variance = variance)
}

```

```

manuscriptexample_P <- function(){
manuscriptexample <-

```

```

    matrix(c( 0, -2, 0, 0, 1,
              2, 0, 3, 0, -5,

```

```
0, -3, 0, 4, 0,  
0, 0, -4, 0, -1,  
-1, 5, 0, 1, 0),  
nrow = 5, byrow = TRUE)  
manuscriptarms <- c(1, 1, 0, 0, 0)  
winsmeanandvariance_real_P(manuscriptexample, manuscriptarms)  
  
}
```

## R-code Two-sample bootstrap

```
#####

# William N Anderson

# R code for the two-sample bootstrap distribution, based on real skew matrices
# Compute means and variances for trial arm wins,
# based on the full bootstrap distribution,
# using an already computed win matrix and trial arms.
# The algorithm is  $O(N^2)$  in time and space.

#
# The algorithm computes the mean win sums and variance that would be observed
# if all bootstrap samples were generated, without the necessity of actually
# computing all the bootstrap samples
#
# February 2023, based on earlier code for the 0-1 case
# This file is self contained

#####

##### utility functions. For package use would put into a separate file
checkmatrixandarms <- function(winmatrix, trialarms){
  if (length(trialarms) != nrow(winmatrix)) stop("Incompatible dimensions in win matrix and trial
arms")
  if (any(winmatrix + t(winmatrix) != 0)) stop("Win matrix not skew")
  if (!all(trialarms %in% c(0, 1))) stop("Invalid trial arms")
}

# Evaluate wins for a U matrix and trial arms
wincomputations_real <- function(winmatrix, trialarms){
  # test rows is the vector of rows corresponding to the treatment arm
  testrows <- which(trialarms == 1)
```

```

comparisonmatrix <- winmatrix[testrows, -testrows]

# K and L correspond to the definitions in the Dong paper -- we might want those someday
K <- pmax(comparisonmatrix, 0) # Test wins are the positive matrix entries; test losses and ties are 0
L <- pmax(-comparisonmatrix, 0) # Control wins are the positive matrix entries; control losses and
ties are 0

winssum <- c(sum(K), sum(L)); names(winssum) <- c("Test Win Sum", "Control Win Sum")

# might want K and L some day, but not today

# list(`Test win matrix` = K, `Control win matrix` = L, winssum = winssum)

winssum
}

#####end utility functions #####

```

```

# Count Cases 1-10 at a specific vertex

# The subscripts on the returned vector are the case numbers

onevertex_B2R <- function(D, starT, starsqT, starC, starsqC){
  # function to compute needed terms for a specific vertex.
  # subscripts correspond to case numbering in manuscript.
  # note that we do not count cases 11-14 directly,
  # since they do not correspond to specific vertices

  c(D*starsqT, (1 - D)* starsqC, D*(starT^2 - starsqT), (1 - D)*(starT^2 - starsqT), D*(starC^2 - starsqC),
# cases 1-5

  (1 - D)*(starC^2 - starsqC), D*starT*starC, (1 - D)*starT*starC, D*starT*starC, (1 - D)*starT*starC ) #
cases 6-10

}

```

```

winsmeanandvariance_real_B2 <- function(winmatrix, trialarms){
  checkmatrixandarms(winmatrix, trialarms) # will stop if data are bad

  N <- length(trialarms) # must be consistent with winmatrix

  treatmentarms <- trialarms == 1; m <- sum(treatmentarms)

  controlarms <- trialarms == 0; n <- sum(controlarms)

```

```

# compute vectors giving the numbers of treatment and control wins for each vertex
treatmentwinmatrix <- outer(treatmentarms, controlarms)*winmatrix*as.integer(winmatrix > 0)
treatmentwinmatrix <- treatmentwinmatrix + t(treatmentwinmatrix)
controlwinmatrix <- outer(controlarms, treatmentarms)*winmatrix*as.integer(winmatrix > 0)
controlwinmatrix <- controlwinmatrix + t(controlwinmatrix)

# using manuscript notation as much as possible
`#T_v` <- rowSums(treatmentwinmatrix) # sum of treatment wins adjacent to vertex
`#Tsqr_v` <- rowSums(treatmentwinmatrix^2) # sum of squares of treatment wins adjacent to vertex
`#C_v` <- rowSums(controlwinmatrix) # sum of control wins adjacent to vertex
`#Csqr_v` <- rowSums(controlwinmatrix^2) # sum of squares of treatment wins adjacent to vertex

Deq1 <- trialarms; Deq0 = 1 - trialarms # manuscript notation
W_T <- `#T_v` %*% Deq1; W_C <- `#C_v` %*% Deq0 # Test and Control win sums
expected = c(W_T, W_C); names(expected) <- c("Test Win Sum", "Control Win Sum")

casematrix <- mapply(onevertex_B2R, trialarms, `#T_v`, `#Tsqr_v`, `#C_v`, `#Csqr_v`)
casecounts <- rowSums(casematrix)
casecounts[11] <- W_T^2 - (casecounts[1] + casecounts[3] + casecounts[4])
casecounts[12] <- W_C^2 - (casecounts[2] + casecounts[5] + casecounts[6])
casecounts[13] <- W_T*W_C - (casecounts[7] + casecounts[8])
casecounts[14] <- W_T*W_C - (casecounts[9] + casecounts[10])
factors <- c((2*m - 1)*(2*n - 1), (2*m - 1)*(2*n - 1), (2*m - 1)*(n - 1), # cases 1:3
            (m - 1)*(2*n - 1), (2*m - 1)*(n - 1), (m - 1)*(2*n - 1), # cases 4:6
            (2*m - 1)*(n - 1), (m - 1)*(2*n - 1), (2*m - 1)*(n - 1), # cases 7:9
            (m - 1)*(2*n - 1), (m - 1)*(n - 1), (m - 1)*(n - 1), # cases 10:12
            (m - 1)*(n - 1), (m - 1)*(n - 1)) # cases 13:14
factors <- factors/(m*n)

# indicators for cases contributing to variance terms
caseindicatorTT <- c(1, 0, 1, 1, 0, 0, 0, 0, 0, 1, 0, 0, 0) # Cases 1, 3, 4, 11
caseindicatorTC <- c(0, 0, 0, 0, 0, 0, 1, 1, 0, 0, 0, 0, 1, 0) # Cases 7, 8, 13
caseindicatorCT <- c(0, 0, 0, 0, 0, 0, 0, 0, 1, 1, 0, 0, 0, 1) # Cases 9, 10, 14
caseindicatorCC <- c(0, 1, 0, 0, 1, 1, 0, 0, 0, 0, 0, 1, 0, 0) # Cases 2, 5, 6, 12

```



```

expTT <- sum(casecounts*factors*caseindicatorTT)
expTC <- sum(casecounts*factors*caseindicatorTC)
expCT <- sum(casecounts*factors*caseindicatorCT)
expCC <- sum(casecounts*factors*caseindicatorCC)
exp <- matrix(c(expTT, expTC, expCT, expCC), nrow = 2)
variance <- exp - expected%*%t(expected)
rownames(variance) <- c("Test Win Sum", "Control Win Sum")
colnames(variance) <- c("Test Win Sum", "Control Win Sum")
# The observed wins are not equal to the expected
# But are computed separately for validation purposes
Observed <- wincomputations_real(winmatrix, trialarms)
list(Observed = Observed, Expected = expected, Variance = variance)
}

```

```

manuscriptexample_B <- function(){
manuscriptexample <-
  matrix(c( 0, -2, 0, 0, 1,
           2, 0, 3, 0, -5,
           0, -3, 0, 4, 0,
           0, 0, -4, 0, -1,
           -1, 5, 0, 1, 0),
         nrow = 5, byrow = TRUE)
manuscriptarms <- c(1, 1, 0, 0, 0)
winsmeanandvariance_real_B2(manuscriptexample, manuscriptarms)

}

```

## SAS-code Permutation

```
/*This code creates an example U matrix*/
Data U;
    input U1 U2 U3 U4 U5;
    datalines;
0 -2 0 0 1
2 0 3 0 -5
0 -3 0 4 0
0 0 -4 0 -1
-1 5 0 1 0
;

/*Assign values to be used later*/
%let nT=2; %let nC=3; %let N=%eval(&nT+&nC);

/*Calculate the indegree, outdegree and counts for ID, 2, 3, 4 and 5*/
Data example;
set U;
array U U1-U&N;
in=0;
ins=0;
out=0;
outs=0;
do i=1 to &N;
    if U[i]<0 then do; in= in-U[i]; ins=ins+U[i]**2; end;
    if U[i]>0 then do; out = out+U[i]; outs=outs+U[i]**2; end;
end;
drop i;
in2_ins=in**2-ins;
out2_outs=out**2-outs;
inout=in*out;
run;

/*Sum over all rows */
proc means data=example (keep=out in outs ins in2_ins out2_outs inout)
noprnt;
    output out=variance sum=;
run;

/*Calculate cases and the variance for the number of wins for the
treatment arm (V_WT), the variance for the number of wins for the control
arm
(V_WC) and their covariance (V_WTWC). Finally calculate the expectation
(Exp_WD) and variance for the win
difference (Var_WD)*/
data variance;
set variance;
factor1=&nT*&nC/(&N*(&N-1));
factor2=&nT*&nC*(&nT - 1)/(&N*(&N - 1)*(&N - 2));
factor3=&nT*&nC*(&nC - 1)/(&N*(&N - 1)*(&N - 2));
factor4=&nT*&nC*(&nT - 1)*(&nC - 1)/(&N*(&N - 1)*(&N - 2)*(&N - 3));
WT=out*factor1;
WC=out*factor1;
V_WT= factor1*ins + factor2*in2_ins + factor3*out2_outs + factor4*(in**2-
(ins+in2_ins+out2_outs+2*inout)) - (factor1*out)**2;
V_WC= factor1*outs + factor2*out2_outs + factor3*in2_ins + factor4*(out**2-
(outs+out2_outs+in2_ins+2*inout)) - (factor1*out)**2;
V_WTWC= factor1*inout + factor4*(in**2-(ins+in2_ins+out2_outs+2*inout)) -
(factor1*out)**2;
Exp_WD=WT-WC;
```

```
Var_WD=V_WT+V_WC-2*V_WTWC;  
run;
```

```
proc print data=variance (keep=WT Exp_WD Var_WD V_WT V_WC V_WTWC); run;
```

## SAS-code Two-sample bootstrap

```
/*This code creates an example U matrix*/
Data U;
    input U1 U2 U3;
    datalines;
0 0 1
3 0 -5
;

/*Define the sample size per treatment arm (needs to be compatible with the
U matrix*/
%let nT=2; %let nC=3;

/*create treatment win matrix (UT) and control win matrix (UC) from U for
both row and column sums*/
Data UT_Dv1;
set U;
array Ut U1-U&nC;
do i=1 to &nC;
    if Ut[i]<0 then Ut[i]=0;
end;
drop i;
run;

Data UC_Dv1;
set U;
array Uc U1-U&nC;
do i=1 to &nC;
    if Uc[i]>0 then Uc[i]=0; else Uc[i]=-Uc[i];
end;
drop i;
run;

proc transpose data = U prefix=U out= U_Dv0 (drop=_NAME_);
run;

Data UT_Dv0;
set U_Dv0;
array Ut U1-U&nT;
do i=1 to &nT;
    if Ut[i]<0 then Ut[i]=0;
end;
drop i;
run;

Data UC_Dv0;
set U_Dv0;
array Uc U1-U&nT;
do i=1 to &nT;
    if Uc[i]>0 then Uc[i]=0; else Uc[i]=-Uc[i];
end;
drop i;
run;

/*sum the wins and squares per row and column for both win matrices*/
Data ST_Dv1;
set UT_Dv1;
array Ut U1-U&nC;
T_Dv1=0;
Ts_Dv1=0;
```

```

do i=1 to &nC;
    if Ut[i]>0 then do;
        T_Dv1= T_Dv1+Ut[i];
        Ts_Dv1 = Ts_Dv1+Ut[i]**2;
    end;
end;
drop i;
run;

Data SC_Dv1;
set UC_Dv1;
array Uc U1-U&nC;
C_Dv1=0;
Cs_Dv1=0;
do i=1 to &nC;
    if Uc[i]>0 then do;
        C_Dv1= C_Dv1+Uc[i];
        Cs_Dv1 = Cs_Dv1+Uc[i]**2;
    end;
end;
drop i;
run;

Data ST_Dv0;
set UT_Dv0;
array Ut U1-U&nT;
T_Dv0=0;
Ts_Dv0=0;
do i=1 to &nT;
    if Ut[i]>0 then do;
        T_Dv0= T_Dv0+Ut[i];
        Ts_Dv0 = Ts_Dv0+Ut[i]**2;
    end;
end;
drop i;
run;

Data SC_Dv0;
set UC_Dv0;
array Uc U1-U&nT;
C_Dv0=0;
Cs_Dv0=0;
do i=1 to &nT;
    if Uc[i]>0 then do;
        C_Dv0= C_Dv0+Uc[i];
        Cs_Dv0 = Cs_Dv0+Uc[i]**2;
    end;
end;
drop i;
run;

/*merge the Dv1 and Dv0 sums and calculate cases */
data S_Dv1;
merge ST_Dv1(keep=T_Dv1 Ts_Dv1) SC_Dv1(keep=C_Dv1 Cs_Dv1);
T2_Ts_Dv1=T_Dv1**2-Ts_Dv1;
C2_Cs_Dv1=C_Dv1**2-Cs_Dv1;
TC_Dv1=T_Dv1*C_Dv1;
run;

data S_Dv0;
merge ST_Dv0(keep=T_Dv0 Ts_Dv0) SC_Dv0(keep=C_Dv0 Cs_Dv0);

```

```

T2_Ts_Dv0=T_Dv0**2-Ts_Dv0;
C2_Cs_Dv0=C_Dv0**2-Cs_Dv0;
TC_Dv0=T_Dv0*C_Dv0;
run;

proc means data=S_Dv1 noprint;
output out=Sum_Dv1 sum=;
run;

proc means data=S_Dv0 noprint;
output out=Sum_Dv0 sum=;
run;

data Sum_U;
merge Sum_Dv1 (drop= _FREQ_ _TYPE_) Sum_Dv0 (drop= _FREQ_ _TYPE_);
run;

/*Calculate case 1-14 and the variance for the number of wins for the
treatment arm (V_WT), the variance for the number of wins for the control
arm
(V_WC) and their covariance (V_WTWC). Finally calculate the expectation
(Exp_WD) and variance for the win
difference (Var_WD)*/
data variance;
set Sum_U;
WT=T_Dv1; /*=T_Dv0 */
WC=C_Dv1; /*=C_Dv0 */
factor1 = (2*&nT-1)*(2*&nC - 1)/(&nT*&nC);
factor2 = (2*&nT-1)*(&nC-1)/(&nT*&nC);
factor3 = (&nT-1)*(2*&nC-1)/(&nT*&nC);
factor4 = (&nT-1)*(&nC-1)/(&nT*&nC);
V_WT = factor1*Ts_Dv1 + factor2*T2_Ts_Dv1 + factor3*T2_Ts_Dv0 +
factor4*(WT**2-Ts_Dv1-T2_Ts_Dv1-T2_Ts_Dv0)-WT**2;
V_WC = factor1*Cs_Dv1 + factor2*C2_Cs_Dv1 + factor3*C2_Cs_Dv0 +
factor4*(WC**2-Cs_Dv1-C2_Cs_Dv1-C2_Cs_Dv0)-WC**2;
V_WTWC = factor2*TC_Dv1 + factor3*TC_Dv0 + factor4*(WT*WC-TC_Dv1-TC_Dv0) -
WT*WC;
Exp_WD=WT-WC;
Var_WD=V_WT+V_WC-2*V_WTWC;
run;

proc print data=variance (keep=V_WT V_WC V_WTWC Exp_WD Var_WD); run;

```
